# Optical imaging of micro-droplets of dried saliva for oral squamous cell carcinoma diagnosis.

Letícia Foiani<sup>1</sup>, Gabrielle Nepomuceno<sup>1</sup>, Julia Toledo<sup>1</sup>, Mariana Alves<sup>2</sup>, Nayara Rodrigues<sup>2</sup>, Celso Bandeira<sup>3</sup>, Mônica Alves<sup>4</sup>, Janete Almeida<sup>2</sup>, Herculano Martinho<sup>1,\*</sup>

<sup>1</sup>Centro de Ciências Naturais e Humanas, Universidade Federal do ABC, Santo André, São Paulo, Brazil.

<sup>2</sup>Departamento de Biociências, Universidade Estadual Paulista Júlio de Mesquita Filho, São José dos Campos, São Paulo, Brazil.

<sup>3</sup>Technology Research Center, Universidade Mogi das Cruzes, Mogi das Cruzes, São Paulo, Brazil.

<sup>4</sup>School of Medicine, Anhembi Morumbi University, São José dos Campos, São Paulo, Brazil.

Corresponding author(s). E-mail(s): [herculano.martinho@ufabc.edu.br](mailto:herculano.martinho@ufabc.edu.br);

## Abstract

Oral cancer, the sixth most common worldwide, is often diagnosed at an advanced stage, impacting patient survival and mortality. Liquid biopsy offers the potential for cancer diagnosis, enabling dynamic tumor monitoring and disease surveillance. Here we validate a novel diagnostic approach using optical images of dried micro-droplets (volume of one  $\mu\text{l}$ ) of saliva samples on glass and platinum substrates, employing Logistic Regression and Support Vector Machine (SVM) models. For each model, accuracy, sensitivity, specificity, and area under the ROC curve were calculated. Our findings indicated that optical density and surface area (SA) obtained from optical images of micro-droplets are suitable parameters of discriminating oral cavity squamous cell carcinoma and healthy individuals. SVM models demonstrate impressive accuracy of 88.10% on glass and 95.00% on Pt substrates, ensuring robust and accurate detection of oral cancer based on these salient features.

**Keywords:** Oral cancer, Diagnosis, Saliva, Liquid biopsy, Support Vector Machine (SVM), Machine learning.

## 1 Introduction

Oral cancer is a malignant tumor that arises from the oral cavity and lips as one of the most common type of head and neck cancer [1, 2]. In 90% of cases, oral cancer originates from squamous cells. Therefore it is called squamous cell carcinoma, or oral cavity squamous cell carcinoma (OSCC) [2]. The annual incidence of OSCC worldwide in 2020

was 377,713 cases for both sexes, with 177,757 deaths. It represents the 8<sup>th</sup> type of cancer in men according to the data from the Global Cancer Observatory[3].

Several investigations pointed out that the use of tobacco (including smokeless tobacco), the excessive consumption of alcohol, the unprotected sun exposure, and even the lack of mouth hygiene,

17 as the main routes leading to oral cancer.[4–6] 68  
18 According to Reidy and Stassen[7] smoking can 69  
19 contribute to the development of OSCC due to the 70  
20 changes caused in the cellular structure of the oral 71  
21 mucosa, contributing to the deficiency in immune 72  
22 system which provides conditions for the devel- 73  
23 opment of an environment favorable to malignant 74  
24 transformation. 75

25 Early diagnosis is an important target, since 76  
26 a significant cause of the increasing number of 77  
27 OSCC cases is related to limitations in early and 78  
28 accurate diagnosis of the disease [2, 8, 9]. 79

29 In general, the majority of OSCC diagnoses 80  
30 are made when the disease is at an advanced level, 81  
31 which decreases survival and increases mortal- 82  
32 ity for patients. Histopathological morphological 83  
33 analysis performed on a biopsed tissue is the gold 84  
34 standart for cancer, OSCC in particular, diagno-  
35 sis. However, this method has some drawbacks  
36 such as the limitation of the region to be analyzed  
37 within a tumor which has high heterogeneity.  
38 The method is performed by visual inspection  
39 by a trained professional, which frequently leads  
40 to interpretative conflicts. Conducting large-scale  
41 population screening and patient monitoring is  
42 hindered by various challenges, including inva-  
43 siveness, high costs, time consumption, and the  
44 requirement for specialized personnel and equip-  
45 ment [10–12], besides to contraindications associ-  
46 ated with systemic diseases [13].

47 Liquid biopsy is a potentially useful technique 95  
48 for the characterization of samples for cancer diag- 96  
49 nosis based on body fluids. It enables monitoring 97  
50 of dynamic tumor burden and active surveillance 98  
51 of disease recurrence [14]. The identification of 99  
52 new molecular biomarkers and the development 100  
53 of new technologies capable real time sensing 101  
54 at the lowest possible costs are an urgent need 102  
55 enabling early diagnosis, as well as the develop- 103  
56 ment of drugs with appropriately chosen for each 104  
57 individual [11, 15] 105

58 Salivary fluid has several practical advantages 106  
59 among other body fluids for biomedical determi- 107  
60 nations. Its collection is non-invasive and painless, 108  
61 without discomfort to patients. In addition, sali- 109  
62 vary fluid collection tends to be a more economical 110  
63 procedure, since it is easily obtained, transported, 111  
64 and stored[16]. Investigations have shown that in 112  
65 saliva biomarkers for oral diseases as, e.g., those 113  
66 associated with systemic problems can be found. 114  
67 Increasingly, disease-specific molecules such as 115

68 breast cancer, cardiovascular disease, and human 69  
70 immunodeficiency virus (HIV) are being identified 71  
72 in this type of body fluid [17, 18].

73 There is great interest in the search for new 74  
75 technologies that allow rapid, non-invasive, and 76  
77 low-cost characterization of biological fluids. This 78  
79 need is most evident in the biomedical field, where 80  
81 rapid diagnosis combined with low cost is a deci- 82  
83 sive factor in reducing mortality [19]. Photonics 84  
85 technologies have been employed for diagnostic  
86 purposes quite promisingly to, e.g., provide early  
87 diagnosis of cancers[20], real-time evaluation of  
88 sepsis[21] and some other purposes[19, 22, 23].

89 Here we present an approach based on anal-  
90 ysis of optical images of micro-droplets of saliva  
91 of healthy and OSCC individuals which enable  
92 discriminate these groups of patients.

## 2 Methodology

### 2.1 Sample collection and storage

93 The research was approved by the Research  
94 Ethics Committee of ICT-UNESP (CAAE  
95 42387315.0.0000.0077). After being informed  
96 about the proposition and conditions of this  
97 study, patients who agreed to participate in the  
98 research signed the Informed Consent Form.  
99 Non-inclusion criteria were patients who had  
100 already undergone any type of oncological treat-  
101 ment, whether surgery, radio, or chemotherapy in  
102 any organ or system, as well as cases of lip cell  
103 carcinoma.

104 Samples consisted of saliva from consecutive  
105 patients who were admitted for diagnosis and  
106 treatment of OSCC at the Head and Neck Surgery  
107 Service of the Municipal Hospital José Carvalho  
108 de Florence in the city of São José dos Cam-  
109 pos/SP - Brazil, the Maternity and Hospital  
110 Celso Pierro of the Pontific Catholic University of  
111 Campinas/SP - Brazil (PUC-Campinas) and the  
112 Municipal Hospital Mário Gatti of Campinas/SP,  
113 with a diagnosis of OSCC aged over 18 years.  
114 After collection, samples were immediately stored  
115 in Nalgene R cryogenic tubes, properly identified  
and numbered, and kept under refrigeration in li-  
quid nitrogen during transportation. Afterwards,  
they were immediately stored in an ultrafreezer  
(-80°C) of Thermo Fisher Scientific Inc. Sam-  
ples were separated into two groups labeled CA  
(patients with OSCC) and CN (control group).

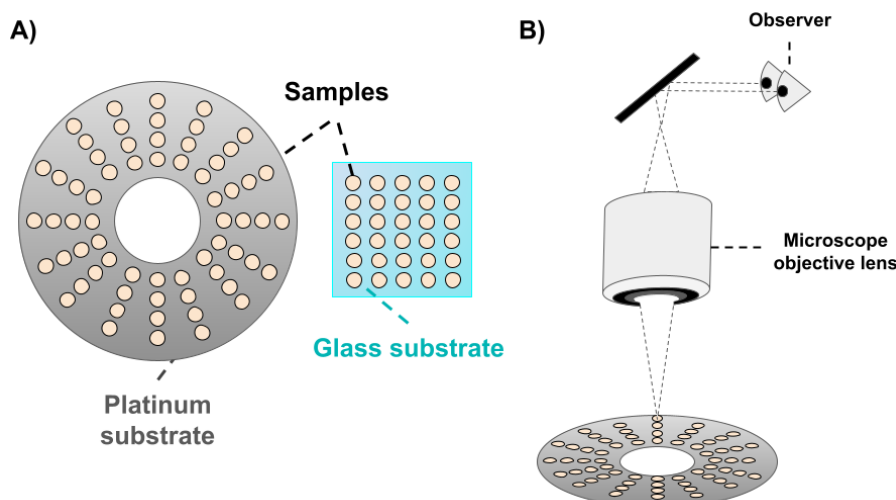

**Fig. 1** Arrangement of microdroplets of saliva samples on Pt and glass substrates (A). Each dried microdroplet was imaged through an optical microscope (B).

116 For each group, 21 samples were used in triplicate  
117 (generating 63 droplets for each group) for every  
118 test conducted here.

## 119 2.2 Sample preparation conditions 120 and optical imaging

121 The main parameters to be considered to ensure  
122 reproducibility in drying procedure were sample  
123 dilution, drying temperature, and relative humid-  
124 ity during drying[24]. The dilutions tested were  
125 1:2; 1:5; 1:10; 1:15; 1:20; 1:30; 1:35, in addition to  
126 the undiluted sample. These dilutions were tested  
127 based on results reported in the literature[24].

128 Published work involving other biofluids[24]  
129 indicates that the best condition involves drying  
130 in an environment with 70% relative humidity.  
131 Thus, to ensure the conditions for saliva prepara-  
132 tion, a stable environment was created with  
133 Sodium Chloride solution that was placed inside  
134 the desiccator and maintained in equilibrium for  
135 24 hours, allowing for a relative humidity of  
136 80%. The temperature of the environment was  
137 controlled at 20°C.

138 After stabilization of the system, samples were  
139 removed from the ultrafreezer, thawed at room  
140 temperature at 25°C, and then 1 $\mu$ L of each pipet-  
141 ted onto the substrates. The drops were prepared  
142 in triplicate. Substrates containing saliva were  
143 then placed in the desiccator for relative-humidity  
144 controlled drying as described above. We tested  
145 3.5 inches circular Pt substrates and 20 $\times$ 20 $\times$ 0.16

146 mm glass coverslips. Figure 1 shows how the  
147 samples were arranged in each substrate. Optical  
148 images were taken using a Zeiss Axio Observer  
149 microscope.

## 150 2.3 Atomic force microscopy

151 Atomic Force Microscopy (AFM) imaging was  
152 performed on the Pt substrate used for pipet-  
153 ting samples. The results of the AFM analysis  
154 unveiled characteristic grooves on the substrate  
155 surface. These grooves presented an average depth  
156 of approximately 245  $\pm$  88 nm. On the other hand  
157 glass covership presented a roughness of 5  $\pm$  2 nm.

## 158 2.4 Data analysis

159 Optical images were treated and analyzed using  
160 the ImageJ package[25]. Here we conducted a  
161 meticulous statistical analysis of the samples  
162 imaging employing two machine learning tech-  
163 niques, specifically logistic regression (LR) and  
164 support vector machine (SVM). LR was used  
165 to scrutinize a dataset comprising one or more  
166 independent predictor variables that determine  
167 an outcome. Usually dealing with binary classifi-  
168 cation problems, LR is based on modeling the  
169 logarithm of odds ratio of outcome probability  $p$   
170 as function of linear combination of independent  
171 predictor ( $pred_i$ ), [26]

$$\ln\left(\frac{p}{1-p}\right) = \sum_{i=1}^N \text{pred}_i \quad (1)$$

172 SVM is known for their robust supervised  
 173 learning capabilities in classification and regres-  
 174 sion analysis, effectively segregate data points  
 175 by constructing a decision boundary that maxi-  
 176 mizes the margin between different classes. This  
 177 feature renders them exceptionally valuable for  
 178 dissecting intricate datasets with distinct mar-  
 179 gins of separation. Integrating both LR and SVM  
 180 in the study aimed to leverage the individual  
 181 strengths of each technique, resulting in a more  
 182 comprehensive and robust analysis of the samples,  
 183 consequently enhancing the accuracy and depend-  
 184 ability of the findings. [27–29] In detail, SVM  
 185 constructs a hyperplane or set of hyperplanes in  
 186 a high dimensional space constituted by predi-  
 187 tor variables, which is employed for classification  
 188 purposes. Separation is achieved by the hyper-  
 189 plane that has the largest distance to the nearest  
 190 training-data point of any class.[30]

191 Performance metrics were computed for each  
 192 algorithm, including accuracy, specificity, sensi-  
 193 tivity, and the Receiver Operating Characteristic  
 194 (ROC) curve. Accuracy serves as an indicator of  
 195 the overall correctness of the classification model,  
 196 while specificity and sensitivity gauge the model’s  
 197 ability to accurately identify negative and positive  
 198 instances, respectively. The ROC curve, a graphi-  
 199 cal representation illustrating the performance  
 200 of a classification model at various thresholds,  
 201 further enriched the analysis. The integration of  
 202 these statistical methods and performance metrics  
 203 ensured a comprehensive and meticulous exami-  
 204 nation of the dataset, thereby bolstering the  
 205 robustness and accuracy of the study’s conclu-  
 206 sions. [31–33]

207 All the statistic tests and models were calcu-  
 208 lated using RStudio[34]. Graphs and figures were  
 209 made using QtiPlot[35] and GIMP [36].

### 210 3 Results

211 The first part of the conducted investigation relied  
 212 on dilutions at various ratios. analyzed on the  
 213 hydrophobic Pt substrate in order to just find  
 214 the dilution proportion that would present the  
 215 greatest homogeneity of solid particles in the sam-  
 216 ples regarding their area. Representative obtained

217 images for the various solutions are shown in  
 218 Fig. 2A). Our findings indicated that increasing  
 219 saliva sample concentration generates a smaller  
 220 dispersion of spots and granulates on droplet over-  
 221 all area. This fact can be evidenced inspecting  
 222 gray-scale histograms of each image (Fig. 2B).  
 223 The histogram widening is evident when compar-  
 224 ing the most diluted sample (1:35) to the most  
 225 concentrated one (no dilution). Dilutions 1:35  
 226 to 1:15 presented gray-scale distribution with 3  
 227 maximums, indicating 3 possible distributing of  
 228 concentration gradient inside the droplet. For 1:10  
 229 case, these 3 distributions start to overlap in 2,  
 230 which in discernible in 1:5 and 1:2 cases. For pure  
 231 salive a clear distribution centered on 130 gray-  
 232 scale value appear beyond the 80. In this sense,  
 233 the 1:5 presented higher homogeneity.

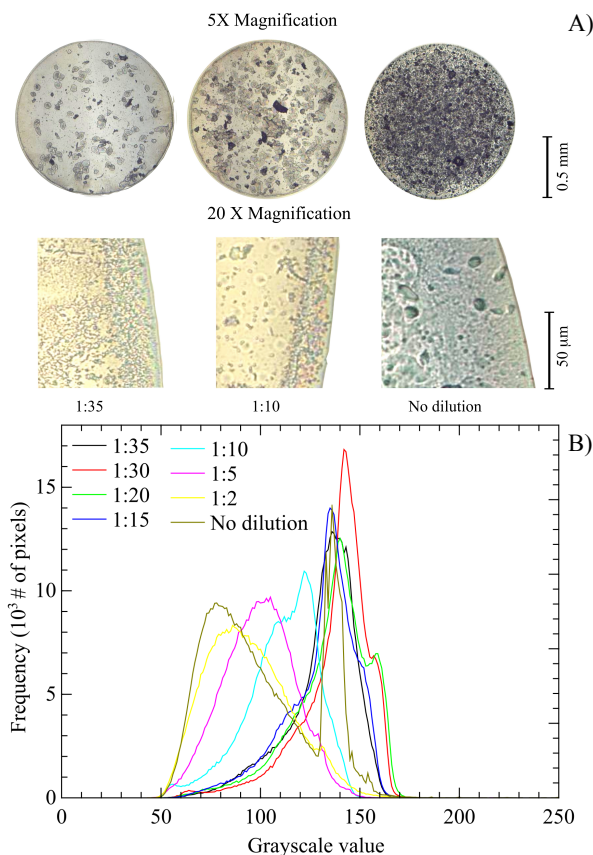

**Fig. 2** A) Some selected optical images of microdroplets of saliva for control group in 1:35 and 1:10 dilutions and no dilution as well for 5X and 20 X magnification. B) Grayscale histograms of optical images (5X magnification) of microdroplets of saliva for control group with varying dilution factors.

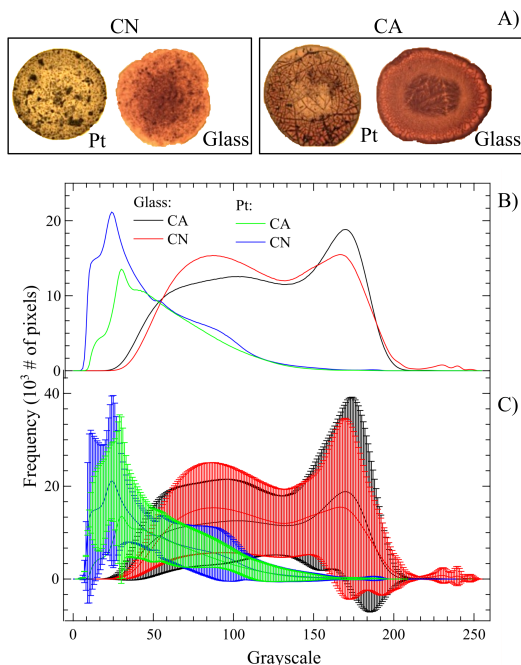

**Fig. 3** A) Selected optical images of undiluted saliva microdroplets from control (CN) and oral cavity squamous cell carcinoma (CA) groups pipetted onto Pt and glass substrates for 5X magnification. B) Average grayscale histograms of dried microdroplets of saliva of control (CN) and oral cavity squamous cell carcinoma (CA) samples analyzed on glass and Pt substrate. The corresponding standard deviation of the data are also shown (C).

Another aspect to be investigated is the concentration gradient at edges of each micro-droplet (called the coffee ring effect), which occurs due to an accumulation of solid particles at the edge of the dried drop which leaves to increasing heterogeneity. Figure 2A) shows representative images at 20X magnification. We notice the absence of coffee ring for microdroplets with concentration higher than 1:5.

Based on all the above data, it was determined that samples would be analyzed without any dilution, since it presented appreciable gray-scale factors along all the droplet size and absence of coffee ring effect. Figure 3 presents selected optical images at 5x magnification for saliva from CN and CA groups, without dilution for Pt and glass substrates. The visual inspection indicated key differences between CN and CA saliva samples. The former group usually shows greater homogeneity in the overall area of the droplet while the last one has characteristic cracks, valleys, and

roughness. These qualitative characteristics can be objectively analyzed by comparing the average gray-scale histograms of all images for the CA and CN groups. Figures 3 B) and C) show the mean histograms and the respective standard deviations for both groups. The general behavior of the curves is quite distinct for the different substrates used, presenting some points that can help in discriminating CA and CN groups, especially at the extremes of the histograms (grey-scale values below 20 and above 230, for example).

The optical density (OD) parameter [37] of each microdroplet was measured, compared, and used to create mathematical models that described the samples and could help in the discrimination between the two groups. The OD values reflect the light absorption or transmission properties of the samples, and these differences might be linked to variations in sample composition, thickness, or interactions with the substrates, ultimately influencing light scattering or absorption. In addition, the surface area (SA) of each microdroplet was also analyzed. We notice that distinctive characteristics were observed in OD and SA for experimental groups and for each substrate. The differences in SA between the glass and Pt substrates could be attributed to varying sample deposition or spreading behaviors, likely arising from the distinct physical properties of the substrates. Factors such as surface roughness, hydrophicity, and surface charge of the glass and Pt may interact differently with the saliva samples, leading to discernible differences in the measured area. Additionally, the observed variations in OD among the sample groups further contribute to the substrate-dependent differences.

Statistical machine learning models based on LR and SVM were developed for the analyzes on OD and SA on different substrates. In Fig. 4, both LR and SVM models are graphically displayed. To validate the classification accuracy for each model a comparative analysis based on the area under the ROC curve (AUC) was performed. This is an evaluational metric used to verify the real performance of a given classificatory model, such as LR. Figure 5 shows the plotted graphics. All the values obtained from the above-mentioned statistical analyses are arranged in Table 1.

The results obtained with LR for glass substrate indicate its high discriminative power.

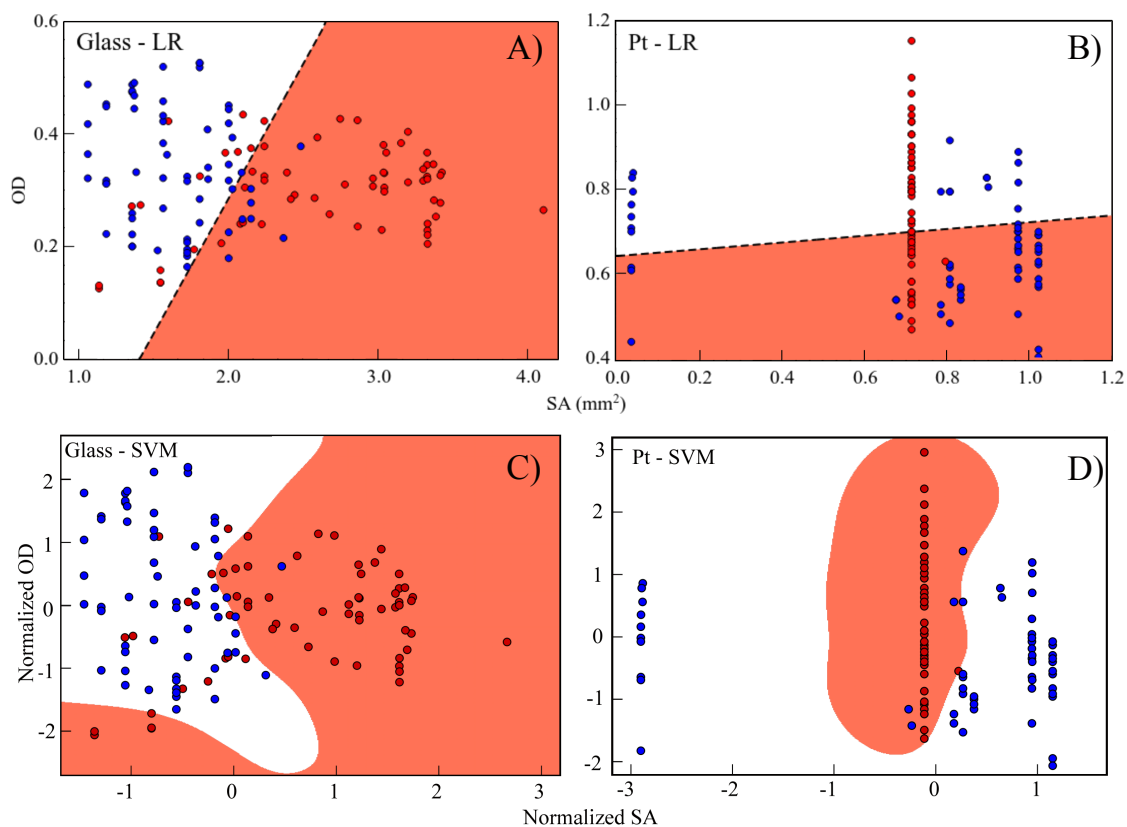

**Fig. 4** Optical density (OD) versus surface area (SA) for control (blue) and OSCC (red) groups. Straight lines at A) and B) represents the  $p = 0.50$  logistic regression (LR) for glass ( $-5.286OD + 4.25410^{-7}SA + 3.390 = 0$ ) and Pt ( $6.923OD - 3.33310^{-6}SA + 4.682 = 0$ ), respectively. Support vector machine (SVM) models obtained for glass and Pt substrates are shown on C) and D). The red filled area in all graphs represents the disease region domain.

**Table 1** Statistical analysis results.

| Model | Substrate | Sensitivity | Specificity | Accuracy | AUC   |
|-------|-----------|-------------|-------------|----------|-------|
| LR    | Glass     | 87.3        | 76.2        | 81.8     | 0.897 |
| LR    | Pt        | 69.5        | 62.3        | 65.8     | 0.706 |
| SVM   | Glass     | 80.9        | 95.2        | 88.1     | 0.880 |
| SVM   | Pt        | 98.3        | 91.6        | 95.0     | 0.950 |

305 Besides having an accuracy of almost 82%, it presented an AUC value higher than excellent level (AUC > 0.80) to validate new diagnostic ways, while sensitivity and specificity values were 87.2% and 76.2%, respectively. In addition, the SVM models applied to the glass substrate also demonstrate promising results. The SVM model achieved an accuracy of 88.1% and an AUC value of 0.880, indicating a strong predictive power and generalization capability. The sensitivity value of 80.9% and specificity value of 95.2% further underscore

316 the model's ability to correctly classify positive and negative cases.

317  
318 The results achieved with the LR model calculated for the analyses performed on the Pt substrate show a significant difference from those previously mentioned. Besides presenting a lower accuracy than the model generated for glass, 65.83%, it presents AUC values, 0.63, and sensitivity and specificity, respectively 0.695 and 0.623, also comparatively lower, representing an poor discriminative capability in these cases. In this

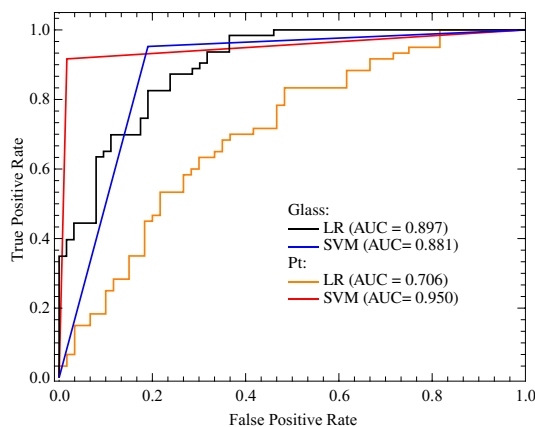

**Fig. 5** ROC curves for glass and Pt substrates in logistic regression (LR) and support vector machine (SVM) models. The area under ROC curve (AUC) is presented for each case.

substrate, the SVM model presented superior performance compared to the LR one, achieving an excellent accuracy of 95.00% and an AUC value of 0.950, which indicates a robust and accurate classification ability in an excellent level. The sensitivity value of 98.3% and specificity value of 91.6% highlight the model's ability to correctly identify true positives and true negatives effectively.

The observed performance differences between the two classifiers can be attributed to SVM's capacity to handle non-linear relationships in the data. SVM effectively captured intricate patterns within the dataset, leading to enhanced classification accuracy. In contrast, LR's reliance on linear separation might have limited ability to handle more complex relationships present in the data, resulting in relatively lower performance metrics.

Changes in proteins, lipids, among other compositions of a tissue or biological sample are key markers for discriminating samples from healthy individuals and samples from patients with some type of pathology, such as tissues with the presence of tumor cells. These compositional characteristics can give rise to distinctive characteristics. As reported by Cameron et al.[24], partial gelatinization, crack formation, concentration gradient, and various heterogeneities can be observed in bio-fluid micro-droplets after drying. The drying process, dilution, and environmental conditions impact the pattern formed after drying[24]. Such a pattern becomes important for various applications such as in industrial processes in drug

screening, DNA imprinting bioassays, and also in the area of vibrational spectroscopy, especially for the use of body bio-fluids for diagnostics[38].

During microdroplet evaporation, three behaviors associated with specific phase transitions can be identified: sol-gel transition, salt or macro-molecule crystallization, and the crystallization and glass transition in colloidal droplets[39]. Signatures of these processes can be observed in the dried spot, such as the shape and size of crystals formed, the morphology of crystalline aggregates, or the morphology of crack patterns in the residue left after drying[39].

For example, Bahmani, Neysari, and Maleki[40] investigated the formation of patterns of droplets from whole blood samples of normal and thalassemia affected individuals. The authors concluded that the formation of the pattern of fissures is very distinct between the groups and, to explain their results, they invoked the differences in bilirubin level and pressure due to shear viscosity dispersion in blood, volume fraction of particles in close packages and initial film thickness.

Furthermore, substrate choice was found to influence the performance of the classification models. SVM's higher accuracy on the glass substrate compared to Pt suggests potential variations in sample-substrate interactions. This discrepancy could be attributed to differences in surface properties and their impact on saliva sample behavior on the respective substrates. Our findings emphasize the importance of considering substrate effects and surface interactions when developing classification models for saliva-based diagnostic applications.

## 4 Conclusion

This investigation employed a comprehensive analysis of saliva micro-droplets onto glass and Pt substrates, focusing on OD and SA as key parameters for classification using different mathematical models. LR and SVM models were used to classify the samples into OSCC or healthy groups based on their features. SVM's use of kernel functions allowed for capturing intricate patterns within the data-set, leading to improved classification accuracy compared to the linear separation approach of LR.

408 LR models provide valuable insights into how  
409 OD and SA predictors influence the likelihood  
410 of a sample belonging to a specific group. In  
411 contrast, SVM models excel at established opti-  
412 mal decision boundaries that effectively separate  
413 the two groups, enabling accurate classification  
414 of new, previously unseen samples (see table 1).  
415 The two models complement each other, offering  
416 a comprehensive understanding of the dataset's  
417 classification patterns. While LR is prized for its  
418 interpretability and ease of implementation, SVM  
419 handles complex, non-linear relationships between  
420 predictors and outcomes through the use of kernel  
421 functions.

422 Significant differences in SA between the glass  
423 and Pt substrates could be attributed to vary-  
424 ing sample deposition and spreading behaviors  
425 on different surfaces, driven by distinct physical  
426 properties. The OD differences may also be related  
427 to sample composition, thickness, or interactions  
428 with the substrates, influencing light scattering or  
429 absorption.

430 These findings pave the way for further  
431 advancements in the field, bringing us closer to  
432 the development of accurate and reliable diagnos-  
433 tic methodologies using sample imaging setups.  
434 The analysis process remains quick, cheap, eas-  
435 ily reproducible, and non-invasive for the patients,  
436 requiring only  $1\mu\text{l}$  of saliva pipetted onto the sub-  
437 strate for accurate classification as positive or neg-  
438 ative for carcinoma. It is important to expand the  
439 investigation to other kinds of diseases as infecto-  
440 contagious (e.g., COVID, influenza and other) and  
441 increase the amount of sampled individuals.

442 **Author contributions.** G.N.: experimental  
443 tests, first draft of the paper, interpretation of  
444 data, statistical modeling, revision of the final  
445 version of the manuscript. L.F.: sample prepa-  
446 ration, microscope data acquisition, experimental  
447 tests, statistical modeling, interpretation of data,  
448 revision of the final version of the manuscript.  
449 M.S.A., N.S.R., and C.M.B.: responsible for sam-  
450 ple collection and preparation of the collected  
451 saliva. M.G.O.A.: responsible for sample collec-  
452 tion and preparation of the collected saliva, and  
453 review of the final version of the manuscript.  
454 J.T.F.: microscope data acquisition. J.D.A: con-  
455 ceived and designed the experiments for sample  
456 collection, and review of the final version of the

457 manuscript. H.S.M.: design of experiments, inter-  
458 pretation of data, and revision of the final version  
459 of the manuscript.

**Acknowledgments.** The authors are grateful  
460 to José Francisco Sales Chaga, Maria Beatriz  
461 Nogueira Pascoal and Flávio Francisco Godoy  
462 Peres, with the collection of saliva from OSCC  
463 patients. They also would like to express their  
464 most sincere gratitude to all patients for their time  
465 and effort and to thank both the Biotechnoscience  
466 and Biophotonics Research Group and the exper-  
467 imental resources provided by Multiuser Central  
468 Facilities at UFABC (CEM/UFABC).  
469

470 This research was funded by the São  
471 Paulo Research Foundation (FAPESP) grant  
472 #2021/10563-9 and #2016/08633-0; the National  
473 Council of Technological and Scientific Develop-  
474 ment (CNPq): scholarship for MSA; and Coordi-  
475 nation for the Improvement of Higher Education  
476 Personnel (CAPES): scholarship for MSA and  
477 NR.

## 478 References

- 479 [1] Ali, K.: Oral cancer—the fight must go on  
480 against all odds. *Evid.-Based Dent* (2022)
- 481 [2] Rivera, C.: Essentials of oral cancer. *Int. J.*  
482 *Clin. Exp. Patho.* **8**(9), 11884 (2015)
- 483 [3] Sung, H., Ferlay, J., Siegel, R.L., Laversanne,  
484 M., Soerjomataram, I., Jemal, A., Bray, F.:  
485 Global cancer statistics 2020: Globocan esti-  
486 mates of incidence and mortality worldwide  
487 for 36 cancers in 185 countries. *CA: a cancer*  
488 *journal for clinicians* **71**(3), 209–249 (2021)
- 489 [4] Kumar, M., Nanavati, R., Modi, T.G.,  
490 Dobariya, C., *et al.*: Oral cancer: Etiology  
491 and risk factors: A review. *J. Canc Res. Ther.*  
492 **12**(2), 458 (2016)
- 493 [5] Dalianis, T.: Human papillomavirus and  
494 oropharyngeal cancer, the epidemics, and sig-  
495 nificance of additional clinical biomarkers for  
496 prediction of response to therapy. *Int. J.*  
497 *Oncol.* **44**(6), 1799–1805 (2014)
- 498 [6] Dhanuthai, K., Rojanawatsirivej, S., Thos-  
499 aporn, W., Kintarak, S., Subarnbhesaj, A.,  
500 Darling, M., Kryshatskyj, E., Chiang, C.-P.,



- 501 Shin, H.-I., Choi, S.-Y., *et al.*: Oral cancer: 544  
502 A multicenter study. *Med. Oral. Patol. Oral.* 545  
503 **23**(1), 23 (2018) 546
- 504 [7] Reidy, J., McHugh, E., Stassen, L.: A review 548  
505 of the relationship between alcohol and oral 549  
506 cancer. *J. Surg.* **9**(5), 278–283 (2011) 550
- 507 [8] Kensler, T.W., Spira, A., Garber, J.E., 551  
508 Szabo, E., Lee, J.J., Dong, Z., Dannenberg, 552  
509 A.J., Hait, W.N., Blackburn, E., Davidson, 553  
510 N.E., *et al.*: Transforming cancer preven- 554  
511 tion through precision medicine and immune- 555  
512 oncology. *Cancer. Prev. Res.* **9**(1), 2–10 556  
513 (2016) 557
- 514 [9] Campbell, J.D., Mazzilli, S.A., Reid, M.E., 558  
515 Dhillon, S.S., Platero, S., Beane, J., Spira, 559  
516 A.E.: The case for a pre-cancer genome atlas 560  
517 (pcga). *Cancer. Prev. Res.* **9**(2), 119–124 561  
518 (2016) 562
- 519 [10] Siravegna, G., Marsoni, S., Siena, S., 563  
520 Bardelli, A.: Integrating liquid biopsies into 564  
521 the management of cancer. *Nat. Rev. Clin.* 565  
522 *Oncol.* **14**(9), 531–548 (2017) 566
- 523 [11] Llovet, J.M., Montal, R., Sia, D., Finn, R.S.: 567  
524 Molecular therapies and precision medicine 568  
525 for hepatocellular carcinoma. *Nat. Rev. Clin.* 569  
526 *Oncol.* **15**(10), 599–616 (2018) 570
- 527 [12] Singh, P., Verma, J.K., Singh, J.K.: Vali- 571  
528 dation of salivary markers, il-1 $\beta$ , il-8 and 572  
529 lgals3bp for detection of oral squamous cell 573  
530 carcinoma in an indian population. *Scientific* 574  
531 *reports* **10**(1), 1–9 (2020) 575
- 532 [13] Sylvie-Louise Avon, D., Klieb, H.: Oral soft- 576  
533 tissue biopsy: an overview. *J Can Dent Assoc* 577  
534 **78**, 75 (2012) 578
- 535 [14] Bellairs, J.A., Hasina, R., Agrawal, N.: 579  
536 Tumor dna: an emerging biomarker in head 580  
537 and neck cancer. *Cancer. Metast. Rev.* **36**(3), 581  
538 515–523 (2017) 582
- 539 [15] Grupper, A., Pereira, N.L.: Prognostic 583  
540 biomarkers for precision medicine in heart 584  
541 transplant: Is galectin-3 the one? *Revista* 585  
542 *Espanola de Cardiologia (English ed.)* 586  
543 **72**(11), 889–891 (2019) 587
- [16] Hema Shree, K., Ramani, P., Sherlin, H., 544  
Sukumaran, G., Jeyaraj, G., Don, K., San- 545  
thanam, A., Ramasubramanian, A., Sundar, 546  
R.: Saliva as a diagnostic tool in oral squa- 547  
mous cell carcinoma—a systematic review 548  
with meta analysis. *Pathol. Oncol. Res.* 549  
**25**(2), 447–453 (2019) 550
- [17] Gualtero, D.F., Suarez Castillo, A.: Biomark- 551  
ers in saliva for the detection of oral squa- 552  
mous cell carcinoma and their potential use 553  
for early diagnosis: a systematic review. *Acta.* 554  
*Odontol. Scand.* **74**(3), 170–177 (2016) 555
- [18] Feng, Y., Li, Q., Chen, J., Yi, P., Xu, X., Fan, 556  
Y., Cui, B., Yu, Y., Li, X., Du, Y., *et al.*: Sali- 557  
vary protease spectrum biomarkers of oral 558  
cancer. *Int. J. Oral Sci.* **11**(1), 1–11 (2019) 559
- [19] Baker, M.J., Hussain, S.R., Lovergne, L., 560  
Untereiner, V., Hughes, C., Lukaszewski, 561  
R.A., Thiéfin, G., Sockalingum, G.D.: Devel- 562  
oping and understanding biofluid vibrational 563  
spectroscopy: a critical review. *Chem Soc* 564  
*Rev* **45**(7), 1803–1818 (2016) 565
- [20] Kumar, S., Srinivasan, A., Nikolajeff, F.: 566  
Role of infrared spectroscopy and imaging in 567  
cancer diagnosis. *Curr. Med. Chem.* **25**(9), 568  
1055–1072 (2018) 569
- [21] Gautam, R., Deobagkar-Lele, M., Majum- 570  
dar, S., Chandrasekar, B., Victor, E., Ahmed, 571  
S.M., Wadhwa, N., Verma, T., Kumar, S., 572  
Sundaresan, N.R., *et al.*: Molecular profil- 573  
ing of sepsis in mice using fourier transform 574  
infrared microspectroscopy. *J. Biophotonics.* 575  
**9**(1-2), 67–82 (2016) 576
- [22] Leal, L., Nogueira, M., Canevari, R., Car- 577  
valho, L.: Photodiagnos. photodynam. Ther- 578  
apy **24**, 237–244 (2018) 579
- [23] Henry, A.-I., Sharma, B., Cardinal, M.F., 580  
Kurouski, D., Van Duyne, R.P.: Surface- 581  
enhanced raman spectroscopy biosensing: in 582  
vivo diagnostics and multimodal imaging. 583  
*Anal. Chem.* **88**(13), 6638–6647 (2016) 584
- [24] Cameron, J.M., Butler, H.J., Palmer, D.S., 585  
Baker, M.J.: Biofluid spectroscopic disease 586  
diagnostics: A review on the processes and 587

- 588 spectral impact of drying. *J. Biophotonics.* 628  
589 **11**(4), 201700299 (2018) 629
- 590 [25] Schindelin, J., Rueden, C.T., Hiner, M.C., 630  
591 Eliceiri, K.W.: The imagej ecosystem: An 631  
592 open platform for biomedical image analy- 632  
593 sis. *Molecular reproduction and development* 633  
594 **82**(7-8), 518–529 (2015) 634
- 595 [26] LaValley, M.P.: Logistic regression. *Circulation* 635  
596 **117**(18), 2395–2399 (2008) 636
- 597 [27] Hastie, T., Tibshirani, R., Friedman, J.H., 637  
598 Friedman, J.H.: *The Elements of Statistical* 638  
599 *Learning: Data Mining, Inference, and* 639  
600 *Prediction vol. 2.* Springer, ??? (2009) 640  
641
- 601 [28] Hosmer Jr, D.W., Lemeshow, S., Sturdi- 642  
602 vant, R.X.: *Applied Logistic Regression.* John 643  
603 Wiley & Sons, ??? (2013) 644
- 604 [29] Cortes, C., Vapnik, V.: Support-vector net- 645  
605 works. *Machine learning* **20**, 273–297 (1995) 646  
647
- 606 [30] Ben-Hur, A., Horn, D., Siegelmann, H.T., 648  
607 Vapnik, V.: Support vector clustering. *Journal*  
608 *of machine learning research* **2**(Dec),  
609 125–137 (2001)
- 610 [31] Student: The probable error of a mean.  
611 *Biometrika* **6**(1), 1–25 (1908)
- 612 [32] Dodge, Y.: *The Concise Encyclopedia of*  
613 *Statistics.* Springer, ??? (2008)
- 614 [33] Powers, D.M.: Evaluation: from precision,  
615 recall and f-measure to roc, informedness,  
616 markedness and correlation. *arXiv preprint*  
617 *arXiv:2010.16061* (2020)
- 618 [34] RStudio Team: *RStudio: Integrated Devel-*  
619 *opment Environment for R.* RStudio,  
620 PBC., Boston, MA (2020). RStudio, PBC.  
621 <http://www.rstudio.com/>
- 622 [35] Vasilef, I.: *Qtiplot: data analysis and sci-*  
623 *entific visualization.* Universiteit Utrecht,  
624 Utrecht, Netherlands (2013)
- 625 [36] The GIMP Development Team: *GIMP.* <https://www.gimp.org>  
626
- 627 [37] Merchant, F.A., Shah, S.K., Castleman,  
K.R.: Chapter eight - object measurement.  
In: Merchant, F.A., Castleman, K.R. (eds.)  
*Microscope Image Processing (Second Edi-*  
*tion), Second edition edn., pp. 153–175.* Aca-  
ademic Press, ??? (2023)
- [38] Zang, D., Tarafdar, S., Tarasevich, Y.Y.,  
Choudhury, M.D., Dutta, T.: Evaporation  
of a droplet: From physics to applications.  
*Physics Reports* **804**, 1–56 (2019)
- [39] Bahmani, L., Neysari, M., Maleki, M.: The  
study of drying and pattern formation of  
whole human blood drops and the effect of  
thalassaemia and neonatal jaundice on the  
patterns. *Colloid. Surface. A.* **513**, 66–75  
(2017)
- [40] Ivett, P.R., Johnson, K.E., Nelson, R.E.:  
Magnetic recording medium having a cobalt-  
platinum-chromium alloy magnetic layer  
and a chromium-tungsten underlayer a spec-  
ified underlayer thickness range. Google  
Patents. US Patent 5,298,324 (1994)
